# Supplementary material for: Gamma-hydroxybutyric acid (GHB) derivatization with N -(3-dimethylaminopropyl)- N ′-ethylcarbodiimide (EDC): LC-HRAM-Orbitrap-MS characterization of GHB and deuterated GHB derivatives and application to blood, urine, and hair analysis
Source: Royal Society of Chemistry journal article supplement (doi:10.1039/d5ay01461a), 2025-12-22
Supplement: d5ay01461a1.pdf [file d5ay01461a1.pdf]

## Caption for supplementary figures

**Figure S1.** Typical full scan mass spectra of GHB-EDC<sub>A</sub> / GHB-EDC<sub>B</sub> (**a**) and D<sub>6</sub>-GHB-EDC<sub>A</sub> / D<sub>6</sub>-GHB-EDC<sub>B</sub> (**b**) derivatives, and accurate mass measurements data of the four MH<sup>+</sup> ions.

**Figure S2.** Derivatization yields of the GHB-EDC derivatives at different temperature and time reaction conditions.

**Figure S3.** Stability of GHB-EDC derivatives kept at different temperatures and times before instrumental injection.

**Figure S4.** MH<sup>+</sup> collision-induced product ion spectra (merging of collision energies at 10, 25, 50 eV) of GHB-EDC, BHB-EDC, and BHisoB-EDC for both type A and type B derivatives.
